# Supplementary material
Source: PubMed Central journal article supplement (PMC6510990)
Supplement: pnas.1901742116.sapp.pdf [file pnas.1901742116.sapp.pdf]

## Supplemental Information

### **Component of splicing factor SF3b plays a key role in translational control of polyribosomes on the endoplasmic reticulum**

Tomonori Ueno<sup>a</sup>, Yuki Taga<sup>a</sup>, Rei Yoshimoto<sup>b</sup>, Akila Mayeda<sup>b</sup>, Shunji Hattori<sup>a,c</sup>, and Kiyoko Ogawa-Goto<sup>a,c\*</sup>

<sup>a</sup>Nippi Research Institute of Biomatrix, Toride, Ibaraki 302-0017, Japan

<sup>b</sup>Institute for Comprehensive Medical Science, Fujita Health University, Toyoake, Aichi 470-1192, Japan

<sup>c</sup>Japan Institute of Leather Research, Adachi, Tokyo 120-8601, Japan

\*To whom correspondence should be addressed:

Dr. Kiyoko Ogawa-Goto

Nippi Research Institute of Biomatrix, Toride, Ibaraki 302-0017, Japan

E-mail: [kgoto@nippi-inc.co.jp](mailto:kgoto@nippi-inc.co.jp)

#### **This PDF file includes:**

Supplementary text

Figures S1 to S5

Tables S1 to S2

References

## **SUPPLEMENTAL EXPERIMENTAL PROCEDURES**

### **Materials and Methods**

#### **Plasmids and cDNA amplification**

Using total mRNAs from HEL cells as templates, cDNAs were obtained by PCR amplification of two human genes, SF3b4 (GenBank No. NP\_005841) and COL1A1 (GenBank No. NM\_000088) and subcloned to generate mammalian expression plasmids. The SF3b4 gene was subcloned into pEF-MycHis (Invitrogen) to generate the expression plasmid pEF-SF3b4. The obtained plasmids were verified by DNA sequencing. Expression plasmids for wild-type and mutant forms of human p180 were prepared as described previously (1). The cDNA of secreted AP (GenBank No. NP\_001623.3) was PCR-amplified using AP-tag4 (Invitrogen) as a template and subcloned into the Nhe I-Xho I site of a mammalian expression plasmid (pEGFP-C3; Clontech). The obtained plasmid, prCMV-SEAP, contained an expression unit for the secreted form of AP driven by the CMV promoter with a polyA signal, but no EGFP-coding region. Restriction enzyme sites for Bgl II and Hind III were introduced between the promoter and the initiation codon to evaluate test sequences. The full-length cDNA of human *COL1A1* (5297 bp) was subcloned into prCMV-SEAP to generate prCMV-fullCOL1A1. prCMV-COL1A1ORF (127–4251) and prCMV-COL1A1 ORF-3'UTR (127–5297) were constructed in a similar manner. The cDNAs encoding the 5' UTR sequences for human *FNI* (266 bp) (GenBank No. NM\_212482.1) and human *CANX* (177 bp) (GenBank No. NM\_001746.30) were amplified by RT-PCR and subcloned into prCMV-SEAP. The sequences in all plasmids were verified by DNA sequencing.

#### **Antibodies**

The following antibodies were used: rabbit antibodies against GFP (Clontech), calnexin (Stressgen), human p180 (N1), (His)<sub>5</sub> tag (Qiagen), glyceraldehyde-3-phosphate dehydrogenase (GAPDH) (Cell Signaling), Sec61 beta (Upstate), Sec61alpha and TRAP alpha (generous gifts from C.V. Nicchitta, Duke University Medical Center); mouse mAbs against human type I procollagen (SP1.D8; Developmental Studies Hybridoma Bank, University of Iowa), and goat antibodies against SF3b4 (Santa Cruz Biotechnology), eukaryotic elongation factor 1a (eEF1a; Santa Cruz Biotechnology), splicing factor 1 (SF1; Abgent), coiled-coil domain-containing protein 50 (CCDC50; Abgent), and lamin A/C (LMNA; GeneTex).

#### **Cell culture**

Culture of HEL fibroblasts was carried out as previously described (1). Ascorbic acid phosphate magnesium salt *n*-hydrate (0.2 mM, Wako) was added to the cells to promote procollagen folding and secretion. A siRNA for human SF3b4 (HSS115684; Life Technologies) and a control siRNA (Stealth™ RNAi Negative Control Duplex; Invitrogen) were used.

#### **Affinity column chromatography of histidine-tagged Ct**

Hexahistidine-tagged Ct protein (His-Ct) was overexpressed in HEL cells. Cytosolic fractions prepared after *in situ* permeabilization were subjected to affinity chromatography using TALON (Clontech). The buffers for the equilibration, washing, and elution steps contained 25 mM Hepes-KOH (pH 7.5), 110 mM potassium acetate, 2.5 mM magnesium acetate, 1 mM EGTA, 0.015% digitonin, and protease inhibitor mixture (EDTA-free Complete Inhibitor Mixture; Roche Applied Science). After extensive washing in 5 mM imidazole-containing buffer, captured His-Ct protein was eluted using 50 mM imidazole-containing buffer and fractionated into four fractions (E1–E4). Western blotting analysis showed that most of the His-Ct was eluted in fractions E1, E2 and E3 (see fig. S2A), whereas no signal was detected in mock-transfected cells. The proteins of E1, E2 and E3 fractions were identified by LC-MS/MS after trypsin digestion as described previously (2).

#### **Tandem mass spectrometry (MS/MS) analyses for identifying proteins in the purified Ct fractions**

The purified fractions were dissolved in 100 mM ammonium bicarbonate and reduced with 10 mM dithiothreitol at 56°C for 30 min, followed by alkylation of the cysteine residues using 25 mM iodoacetamide at room temperature for 30 min in the dark. The samples were digested with sequencing grade modified trypsin (Promega) at 37°C for 16 h. The sample solutions were then acidified with formic acid and the proteins were identified using a mass spectrometer (3200 QTRAP; AB Sciex) coupled to an HPLC system (Agilent 1200 Series; Agilent Technologies). The peptide mixtures were separated on an Ascentis Express C18 column (2.7- $\mu$ m particle size; L  $\times$  I.D. 150 mm  $\times$  2.1 mm; Supelco). The eluted peptides were analyzed using an information-dependent acquisition method operated by selecting the two most intense precursor ions in a prior survey MS scan and then subjecting the precursor ions to MS/MS fragmentation. The collision energy was automatically determined based on the mass and charge state of the precursor ions using rolling collision energy. The MS and MS/MS scans were obtained over the *m/z* ranges of 400–1300 and 100–1700, respectively. The acquired MS/MS spectra were searched against the UniProtKB/Swiss-Prot database (release 2011\_08, July 2011) for *Homo sapiens* (20244 protein entries)

using ProteinPilot software 4.0 (AB Sciex) with the Paragon™ algorithm. Search parameters included digestion by trypsin, cysteine alkylation by iodoacetamide, biological modifications ID focus, and 66% protein confidence threshold. Default parameters, including the number of missed cleavages permitted and the mass tolerance for precursor ions and fragment ions, were adopted by the software.



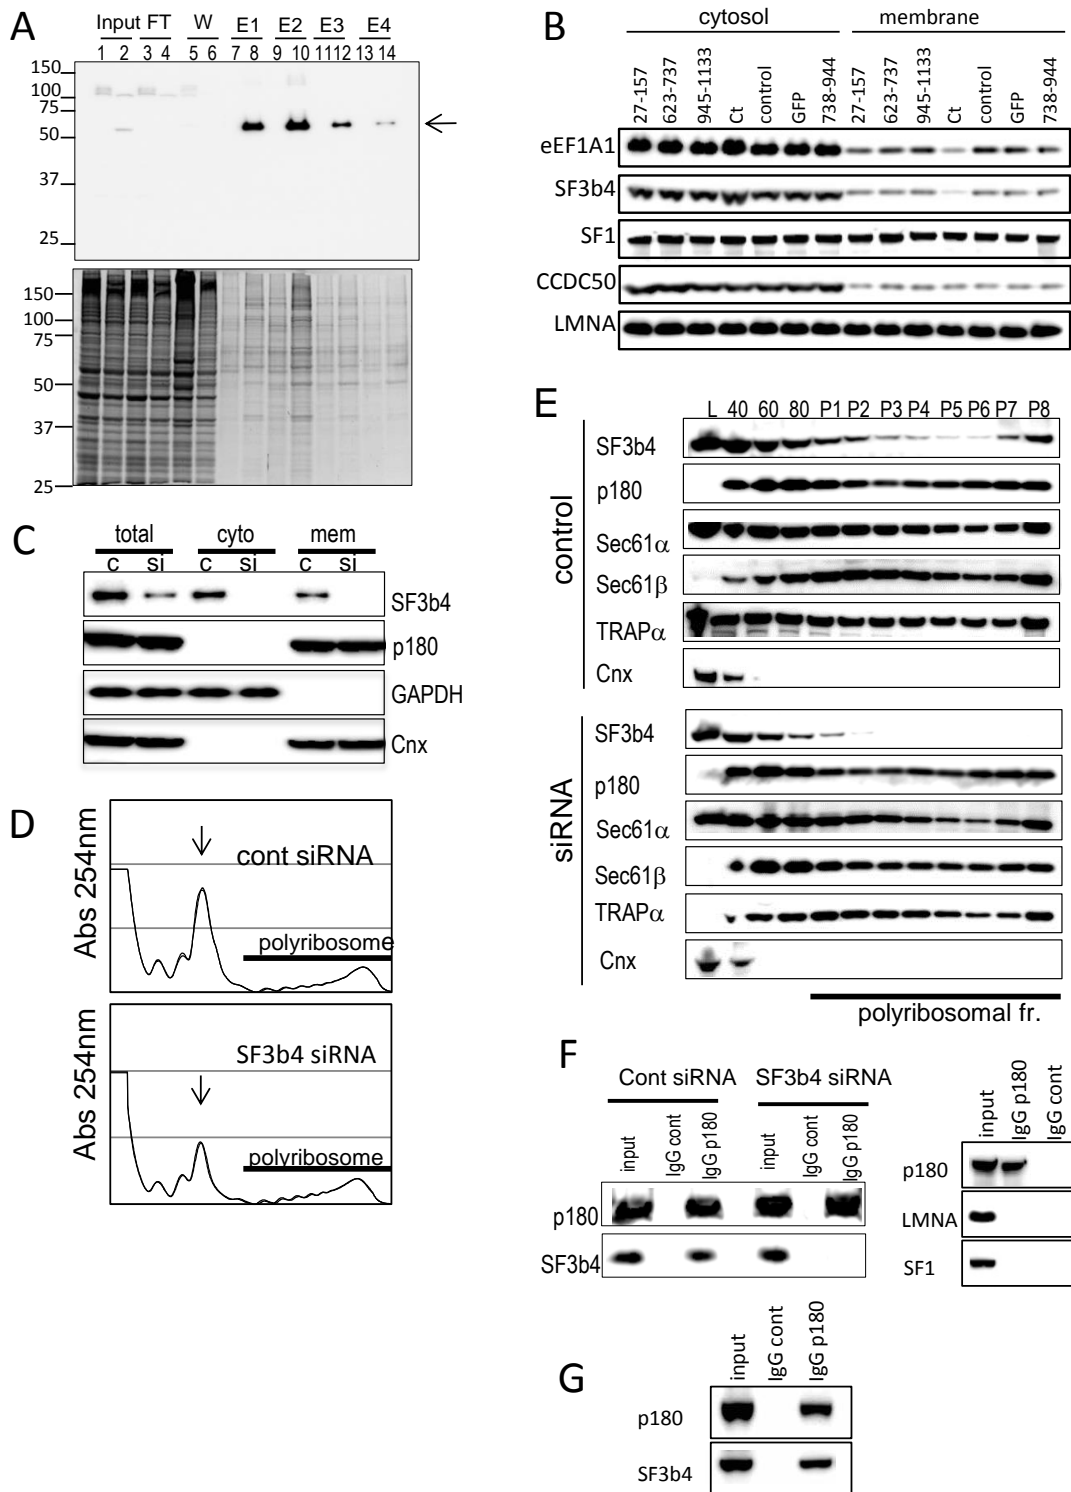

**fig. S2.** Related to Figure 2.

(A) Ascorbate-treated HEL cells were transfected with hexahistidine-tagged Ct (even number lanes) or mock-transfected (odd number lanes) and the cytosolic fractions were subjected to Talon affinity column chromatography (FT: flow-through fraction; W: wash fraction; E1–E4:

elution fractions with 50 mM imidazole-containing buffer). The eluted Ct detected using an anti-(His)<sub>5</sub> tag antibody by western blotting is shown with an arrow (upper panel). Protein staining of the gel with Oriole (QIAGEN) is shown in the lower panel. (B) The cytosolic and membrane fractions of GFP-tagged polypeptides expressed in HEL cells were analyzed by western blotting. (C) Total cell lysates, cytosolic fractions, and membrane fractions from HEL cells treated with control siRNA or siRNA specific for human SF3b4 were analyzed by western blotting to monitor cytoplasmic (GAPDH) and membrane (calnexin (Cnx), p180) marker proteins. (D) Membrane fractions of HEL cells treated with control siRNA or SF3b4-specific siRNA were subjected to sucrose density gradient centrifugation and their RNA profiles were monitored at 254 nm. Arrows indicate peaks corresponding to the 80S ribosome. (E) Western blot analysis of translocon components in the membrane fractions after sucrose density gradient centrifugation, as used in (D). (F) The membrane fractions of HEL cells treated with control siRNA or siRNA against SF3b4 were immunoprecipitated with an anti-p180 antibody or control IgG. Specific immunoprecipitation with the anti-p180 antibody was verified by western blotting (left). Specificity of the immunoprecipitation was confirmed by using antibodies against the negative control proteins, LMNA and SF1. These proteins were not immunoprecipitated when subjected to the same protocol (right). (G) The membrane fractions were treated with S1 nuclease (New England Biolabs) at 37°C for 15 min. After adding EGTA (final conc. 5 mM), immunoprecipitation with the anti-p180 antibody was performed. Ribonuclease treatment failed to disturb SF3b4-p180 interaction, indicating that this interaction is not dependent on RNA.

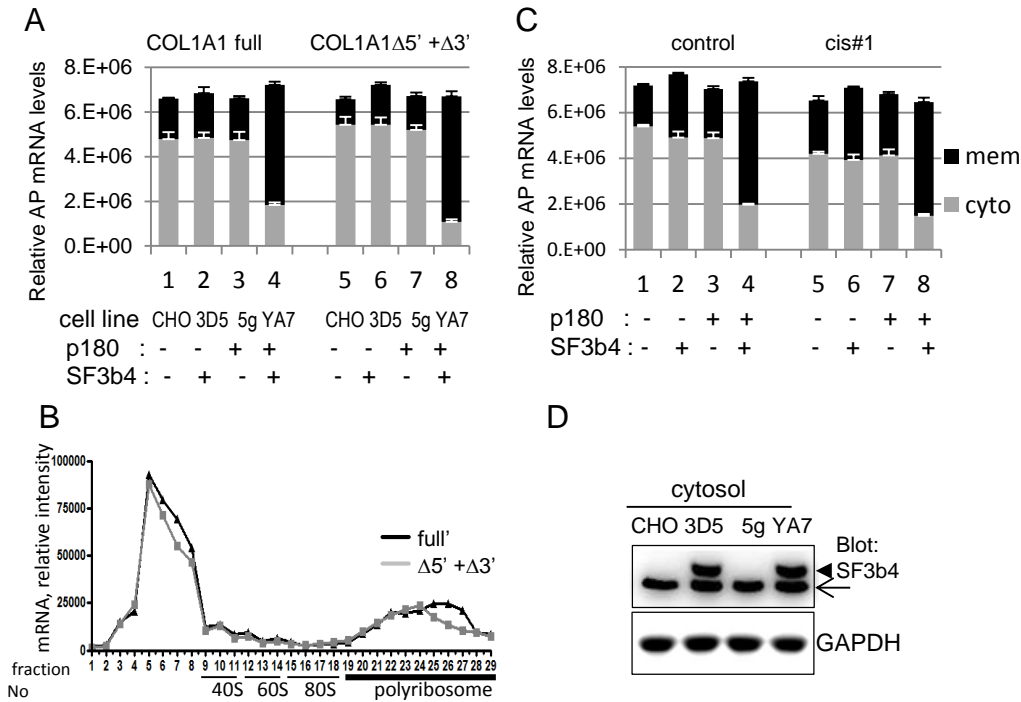

**fig. S3.** Related to Figure 3 and Figure 4.

(A) The four indicated cell lines were transfected with full-length (left) or a mutant  $\Delta$ 5 +  $\Delta$ 3' *COL1A1* cDNA as in Fig. 3B, and cytosolic and membrane fractions were prepared. Relative *COL1A1* mRNA expression levels were estimated by qPCR. Data represent means  $\pm$  SD (n = 3 or 4). (B) Polyribosomal profiles of *COL1A1* cDNA of the membrane fractions of YA7 cells after sucrose density gradient centrifugation are shown. The cells had been transfected with expression plasmids encoding full-length (black) or mutant  $\Delta$ 5+  $\Delta$ 3' (grey) *COL1A1* cDNA. A clear peak shift was observed for full-length *COL1A1* cDNA. (C) The four cell lines were transfected with reporter plasmids and their relative amounts of cDNA encoding secreted AP mRNA are shown as in (A). Columns 1–4: control reporter plasmid without the *cis*-element; columns 5–8: reporter plasmid containing the *cis*#1 element upstream of the initiation codon. Data represent means  $\pm$  SD (n = 3). (D) Western blotting analyses of cytosolic fractions of the indicated cell lines are shown. YA7 and 3D5 cells showed similar levels of cytosolic SF3b4. An arrow represents positions for endogenous SF3b4, while an arrowhead is that of recombinant (myc-tagged) SF3b4.



A

cis#1-sub (T) :

TCGTCGTTTTTTTTTTGGAGTTTCTCCTCGGGGTCCGAGCAGGAGGCACGCGGAGTGTTTTTTTTTTTCATTTTTTTTTTTCTAACCCCTCCCCAGCCACAAATTTTTTTTTTTGTCTAGGGTCTAGAC

cis#2-sub (T) :

GCCCCGCGCCGGCTGTGCTGCACAGGGGGAGGATTTTTTTTTTCCAGGCGCGAGCGGGATTTTTTTTTTTGCAGCCACAACCTTCTCTGGTCTCTGCATCCCTTCTGTCCCTCCACCCGTCCCCTTCCCCACCCCTCTGGCCCACACCTTCTTGTTTTTTTTTTACCCCCGGGAGGCATTAGAAGGGATTTTTCCCAGGTTGCGAAGGGAAGCAAACCTTGGTGGCAACTTGCCTCCCGGTGCGGGCGTCTCTCCCCACCGTCTCAAC

B

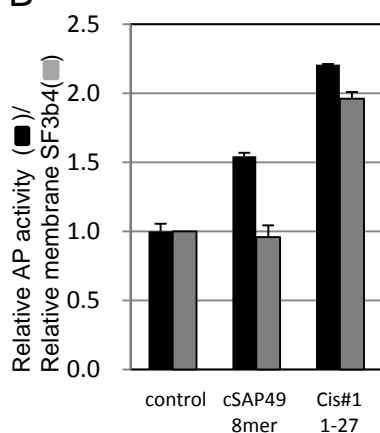

C

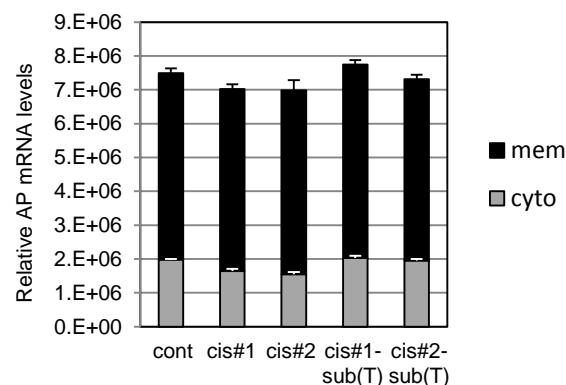

**fig. S4.** Related to Figure 5.

(A) Sequence of the mutated cis#1 and cis#2 elements lacking the motifs (used in Fig. 5C and D). (B) YA7 cells were transfected with reporter plasmids containing nt 1–27 of cis#1 or the octamer CGUGUGAG. Relative AP activities in samples of medium (black bars) and the relative amount of membrane SF3b4 (gray bars) estimated by densitometric scanning of western blots at 18 h post-transfection are shown. The values in control experiments using empty reporter plasmid were set as 1. Data of relative AP activity represent means  $\pm$  SD ( $n = 3$ ). (C) Relative AP mRNA levels of the membrane and cytosol fractions of cells in Fig. 5D are shown. Data represent means  $\pm$  SD ( $n = 3$  or 4).

**A****NQDATVYVGGGLDEK**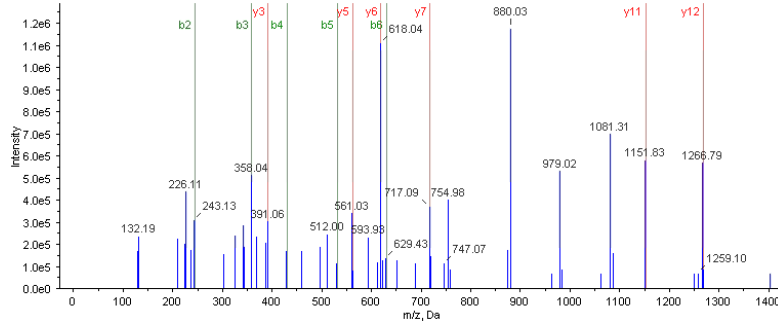

|   | b       | y       |
|---|---------|---------|
| N | 115.05  | 1508.72 |
| Q | 243.11  | 1394.68 |
| D | 358.14  | 1266.62 |
| A | 429.17  | 1151.59 |
| T | 530.22  | 1080.56 |
| V | 629.29  | 979.51  |
| Y | 792.35  | 880.44  |
| V | 891.42  | 717.38  |
| G | 948.44  | 618.31  |
| G | 1005.46 | 561.29  |
| L | 1118.55 | 504.27  |
| D | 1233.57 | 391.18  |
| E | 1362.62 | 276.16  |
| K | 1490.71 | 147.11  |

**B****VTGQHQQGYGFVEFLSEEDADYAIKIMNMIK**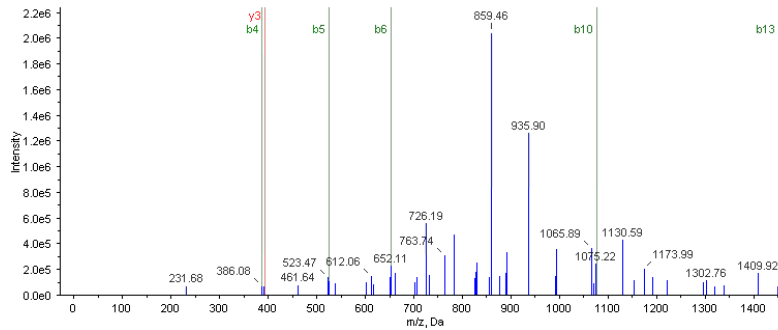

|   | b       | y       |
|---|---------|---------|
| V | 100.08  | 3433.64 |
| T | 201.12  | 3334.58 |
| G | 258.14  | 3233.53 |
| Q | 386.20  | 3176.51 |
| H | 523.26  | 3048.45 |
| Q | 651.32  | 2911.39 |
| G | 708.34  | 2783.33 |
| Y | 871.41  | 2726.31 |
| G | 928.43  | 2563.25 |
| F | 1075.50 | 2506.22 |
| V | 1174.56 | 2359.16 |
| E | 1303.61 | 2260.09 |
| F | 1450.68 | 2131.05 |
| L | 1563.76 | 1983.98 |
| S | 1650.79 | 1870.89 |
| E | 1779.83 | 1783.86 |
| E | 1908.88 | 1654.82 |
| D | 2023.90 | 1525.78 |
| A | 2094.94 | 1410.75 |
| D | 2209.97 | 1339.71 |
| Y | 2373.03 | 1224.68 |
| A | 2444.07 | 1061.62 |
| I | 2557.15 | 990.58  |
| K | 2685.25 | 877.50  |
| I | 2798.33 | 749.40  |
| M | 2929.37 | 636.32  |
| N | 3043.41 | 505.28  |
| M | 3174.45 | 391.24  |
| I | 3287.54 | 260.20  |
| K | 3415.63 | 147.11  |

**fig. S5.** MS/MS spectra of tryptic peptides. Related to Figure 2 and Table S1.

(A) NQDATVYVGGGLDEK ( $m/z$  754.86,  $z = 2$ ) and (B) VTGQHQQGYGFVEFLSEEDADYAIKIMNMIK ( $m/z$  859.16,  $z = 4$ ) of SF3b4 are shown.

**Table S1. Summary of identified proteins that were specifically co-purified with the Ct protein**

Related to Figure 2 and figure S2.

| Fraction | N        | Score       | Coverage (%) | Accession number             | Protein                                           | Membrane localization* |
|----------|----------|-------------|--------------|------------------------------|---------------------------------------------------|------------------------|
| Ct_E1    | 1        | 6.2         | 9.7          | sp Q9P2E9 RRBP1_HUMAN        | Ribosome-binding protein 1                        | Recombinant Ct derived |
|          | 2        | 4.64        | 8.3          | sp Q68EM7 RHG17_HUMAN        | Rho GTPase-activating protein 17                  | -                      |
|          | 3        | 4           | 6.4          | sp P08670 VIME_HUMAN         | Vimentin                                          | -                      |
|          | 4        | 0.52        | 5.3          | sp O75083 WDR1_HUMAN         | WD repeat-containing protein 1                    | -                      |
| Ct_E2    | 1        | 8.03        | 42.4         | sp Q9P2E9 RRBP1_HUMAN        | Ribosome-binding protein 1                        | Recombinant Ct derived |
|          | 2        | 4.08        | 24.2         | sp Q5VTE0 EF1A3_HUMAN        | Putative elongation factor 1-alpha-like 3         | +                      |
|          | <b>3</b> | <b>3.53</b> | <b>28.8</b>  | <b>sp Q15427 SF3B4_HUMAN</b> | <b>Splicing factor 3B subunit 4</b>               | +                      |
|          | 4        | 2.86        | 14.5         | sp P02545 LMNA_HUMAN         | Prelamin-A/C                                      | +                      |
|          | 5        | 2.56        | 22.6         | sp O75083 WDR1_HUMAN         | WD repeat-containing protein 1                    | -                      |
|          | 6        | 2.49        | 6.6          | sp O94979 SC31A_HUMAN        | Protein transport protein Sec31A                  | -                      |
|          | 7        | 2.34        | 39.9         | sp Q8IVM0 CCD50_HUMAN        | Coiled-coil domain-containing protein 50          | +                      |
|          | 8        | 2           | 10           | sp Q8WV24 PHLA1_HUMAN        | Pleckstrin homology-like domain family A member 1 | -                      |
|          | 9        | 1.55        | 25.5         | sp Q86TI2 DPP9_HUMAN         | Dipeptidyl peptidase 9                            | -                      |
|          | 10       | 1.55        | 14.8         | sp Q14764 MVP_HUMAN          | Major vault protein                               | -                      |
|          | 11       | 0.62        | 9.1          | sp Q15637 SF01_HUMAN         | Splicing factor 1                                 | +                      |
|          | 12       | 0.49        | 8.4          | sp P12268 IMDH2_HUMAN        | Inosine-5'-monophosphate dehydrogenase 2          | -                      |
| Ct_E3    | 1        | 3.78        | 34.4         | sp Q5VTE0 EF1A3_HUMAN        | Putative elongation factor 1-alpha-like 3         | +                      |
|          | 2        | 2.38        | 29.3         | sp Q9P2E9 RRBP1_HUMAN        | Ribosome-binding protein 1                        | Recombinant Ct derived |
|          | 3        | 1.89        | 14.1         | sp O95817 BAG3_HUMAN         | BAG family molecular chaperone regulator 3        | -                      |
|          | 4        | 1.49        | 19           | sp P27816 MAP4_HUMAN         | Microtubule-associated protein 4                  | -                      |
|          | 5        | 1.36        | 12.5         | sp Q86TI2 DPP9_HUMAN         | Dipeptidyl peptidase 9                            | -                      |

Nonspecific proteins identified in mock-transfected HEL cells are excluded from the list. MS/MS spectra of tryptic peptides of SF3b4 are shown in fig. S5.

\*Localization of these proteins in the membrane fraction was examined by western blotting with specific antibodies, respectively. +: positive, -:negative

**Table S2. Features of 5' UTR sequences of genes for p180-dependent and independent proteins**

| Human gene    | Kozak consensus sequence* | cDNA sequence from -6 to +4 | Expression level after p180 depletion | Number of the motif sequence** in 5' UTR |
|---------------|---------------------------|-----------------------------|---------------------------------------|------------------------------------------|
| <i>COL1A1</i> | –                         | ctagacATGt                  | down, mRNA shift                      | 4                                        |
| <i>FN1</i>    | –                         | ctaacATGc                   | down, mRNA shift                      | 3                                        |
| <i>CANX</i>   | conserved                 | gctacgATGg                  | unchanged                             | 0                                        |
| <i>MMP2</i>   | conserved                 | cccaccATGg                  | unchanged                             | 0                                        |
| <i>TIMP1</i>  | conserved                 | cccaccATGg                  | unchanged                             | 0                                        |

\*: A canonical Kozak consensus sequence is “gcc(a/g)ccATGg”, which of the – 3 and the + 4 nucleotides are known to be particularly important in efficient translation and are indicated in red.  
 \*\*: SF3b4-responsive motif sequence (GAG-(x)<sub>3</sub>-ACA/G/C).

## References

- (1) Ogawa-Goto K, et al. (2007) p180 is involved in the interaction between the endoplasmic reticulum and microtubules through a novel microtubule-binding and bundling domain. *Mol Biol Cell* 18(10):3741-3751.
- (2) Taga Y, Kusubata M, Ogawa-Goto K, & Hattori S (2012) Development of a novel method for analyzing collagen O-glycosylations by hydrazide chemistry. *Mol Cell Proteomics* 11(6):10.1074/mcp.M1111.010397.
